# Supplementary material
Source: PubMed Central journal article supplement (PMC6482918)
Supplement: Supp_Fig1.pdf [file Supp_Fig1.pdf]

## Supplementary Data

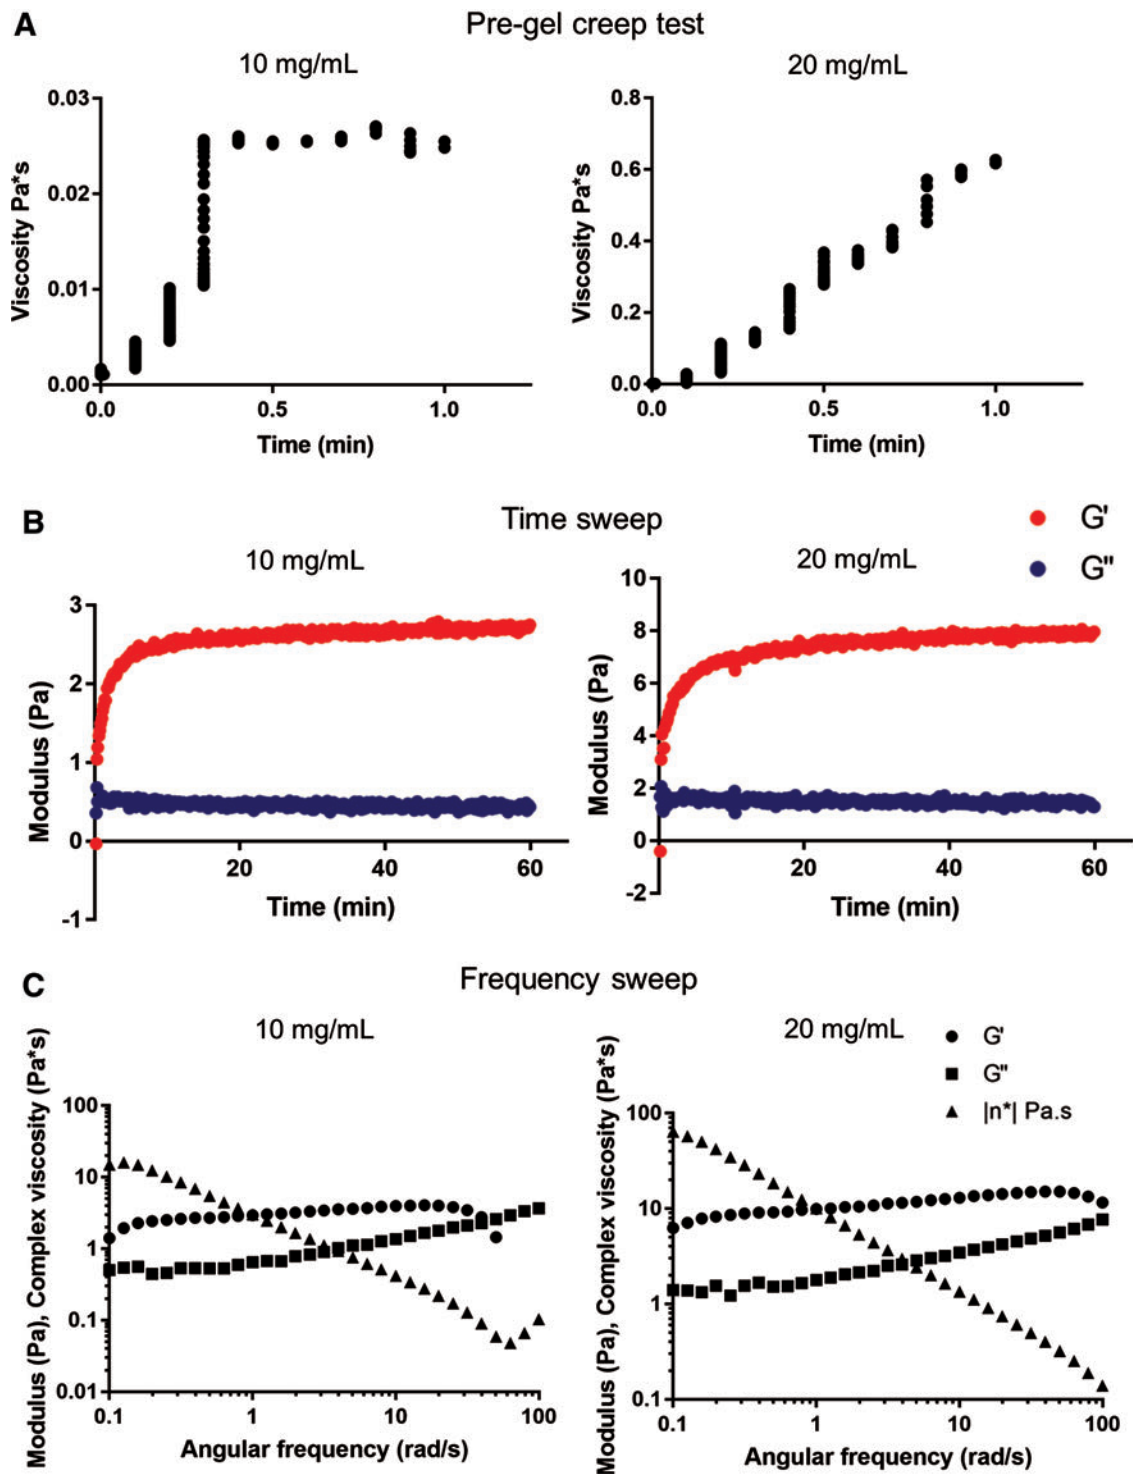

**SUPPLEMENTARY FIG. S1.** Rheological properties of htECM hydrogel. Rheological measurements were taken for htECM hydrogel at both 10 and 20 mg/mL. (A) Creep test showed that preformed hydrogel had a higher viscosity at 20 mg/mL than at 10 mg/mL. (B) Time sweep test showed storage ( $G'$ ) and loss ( $G''$ ) moduli of forming gels approximately one order of magnitude apart from each other at both concentrations, indicating a true hydrogel. (C) Frequency sweep test of formed gel showed similar elastic behaviors between each concentration; the 20 mg/mL gel had higher viscosity. htECM, human testicular extracellular matrix.
