# Supplementary material
Source: PubMed Central journal article supplement (PMC6482918)
Supplement: Supp_Fig2.pdf [file Supp_Fig2.pdf]

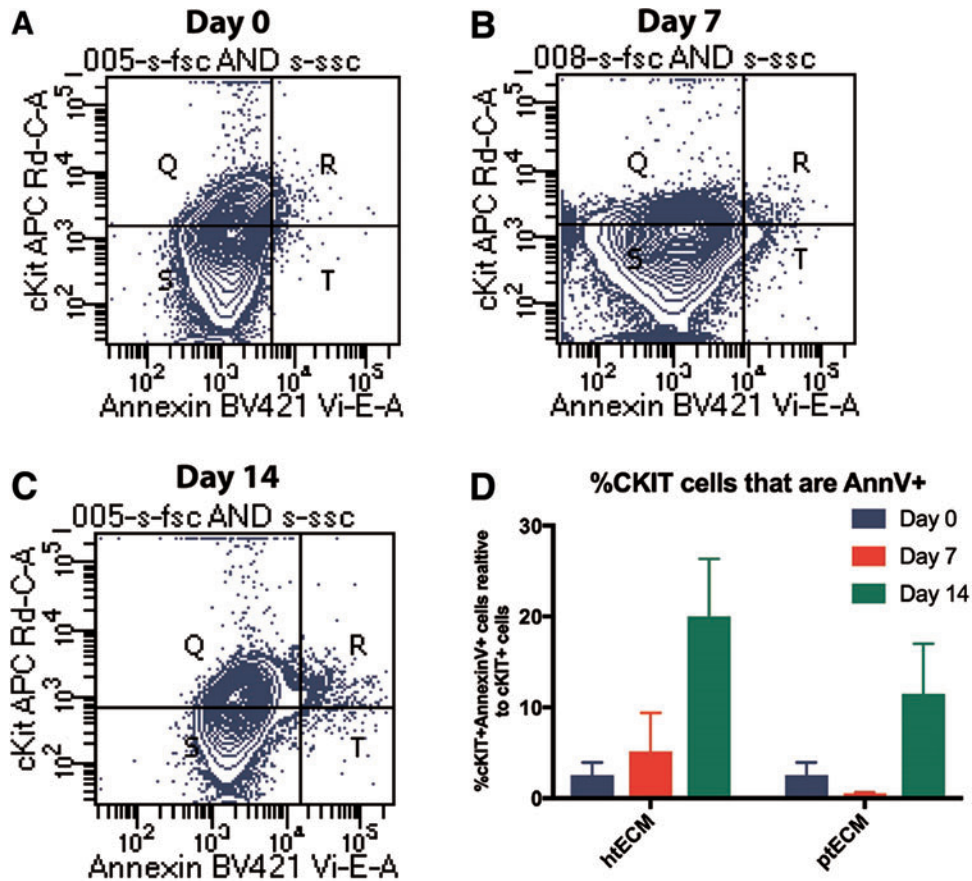

**SUPPLEMENTARY FIG. S2.** Proportion of cKIT<sup>+</sup> cells undergoing apoptosis. (A–C) Flow cytometry analysis was used to quantify cKIT<sup>+</sup> annexin V<sup>-</sup> (quadrant Q) cKIT<sup>+</sup> annexin V<sup>+</sup> (quadrant R) and cKIT<sup>-</sup>annexin V<sup>+</sup> cells (quadrant T) on days 0, 7, and 14. (D) A trend toward increasing apoptotic cKIT<sup>+</sup> cells was observed relative to total cKIT<sup>+</sup> cells on both ECMs, although the difference was not statistically significant. Bar graphs are represented as mean ± SEM. ECM, extra-cellular matrix; SEM, standard error of the mean.
