# Supplementary material
Source: PubMed Central journal article supplement (PMC6482918)
Supplement: Supp_Fig3.pdf [file Supp_Fig3.pdf]

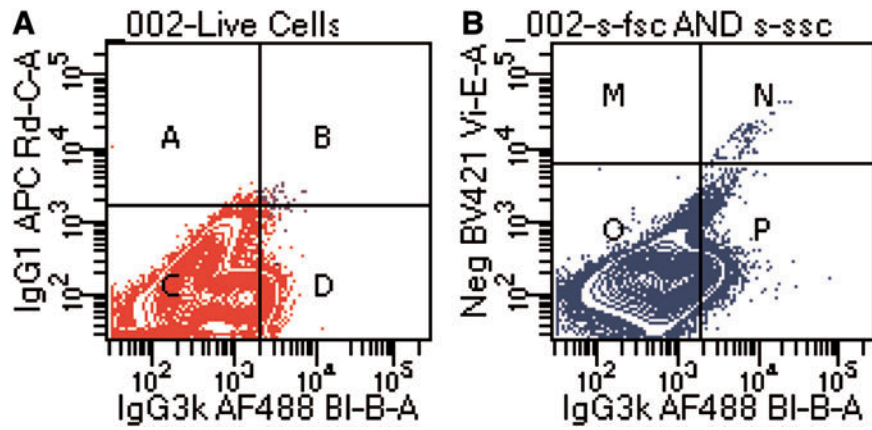

**SUPPLEMENTARY FIG. S3.** Isotype controls. Isotype controls for (A) SSEA4, cKIT, Ki-67 and (B) Annexin V staining on flow cytometry. Gates to select positive cells were defined by staining human testicular cells with AF488, APC, BUV395 isotype control antibodies to define negative cells. SSEA4, stage-specific embryonic antigen 4.
